# Supplementary figures and images for: Digital interventions for people living with non-communicable diseases in India: A systematic review of intervention studies and recommendations for future research and development
Source: PubMed Central journal article supplement — Digit Health. 2019 Dec 16;5:2055207619896153. doi: 10.1177/2055207619896153 (PMC6920343; doi:10.1177/2055207619896153), 2019-12-16

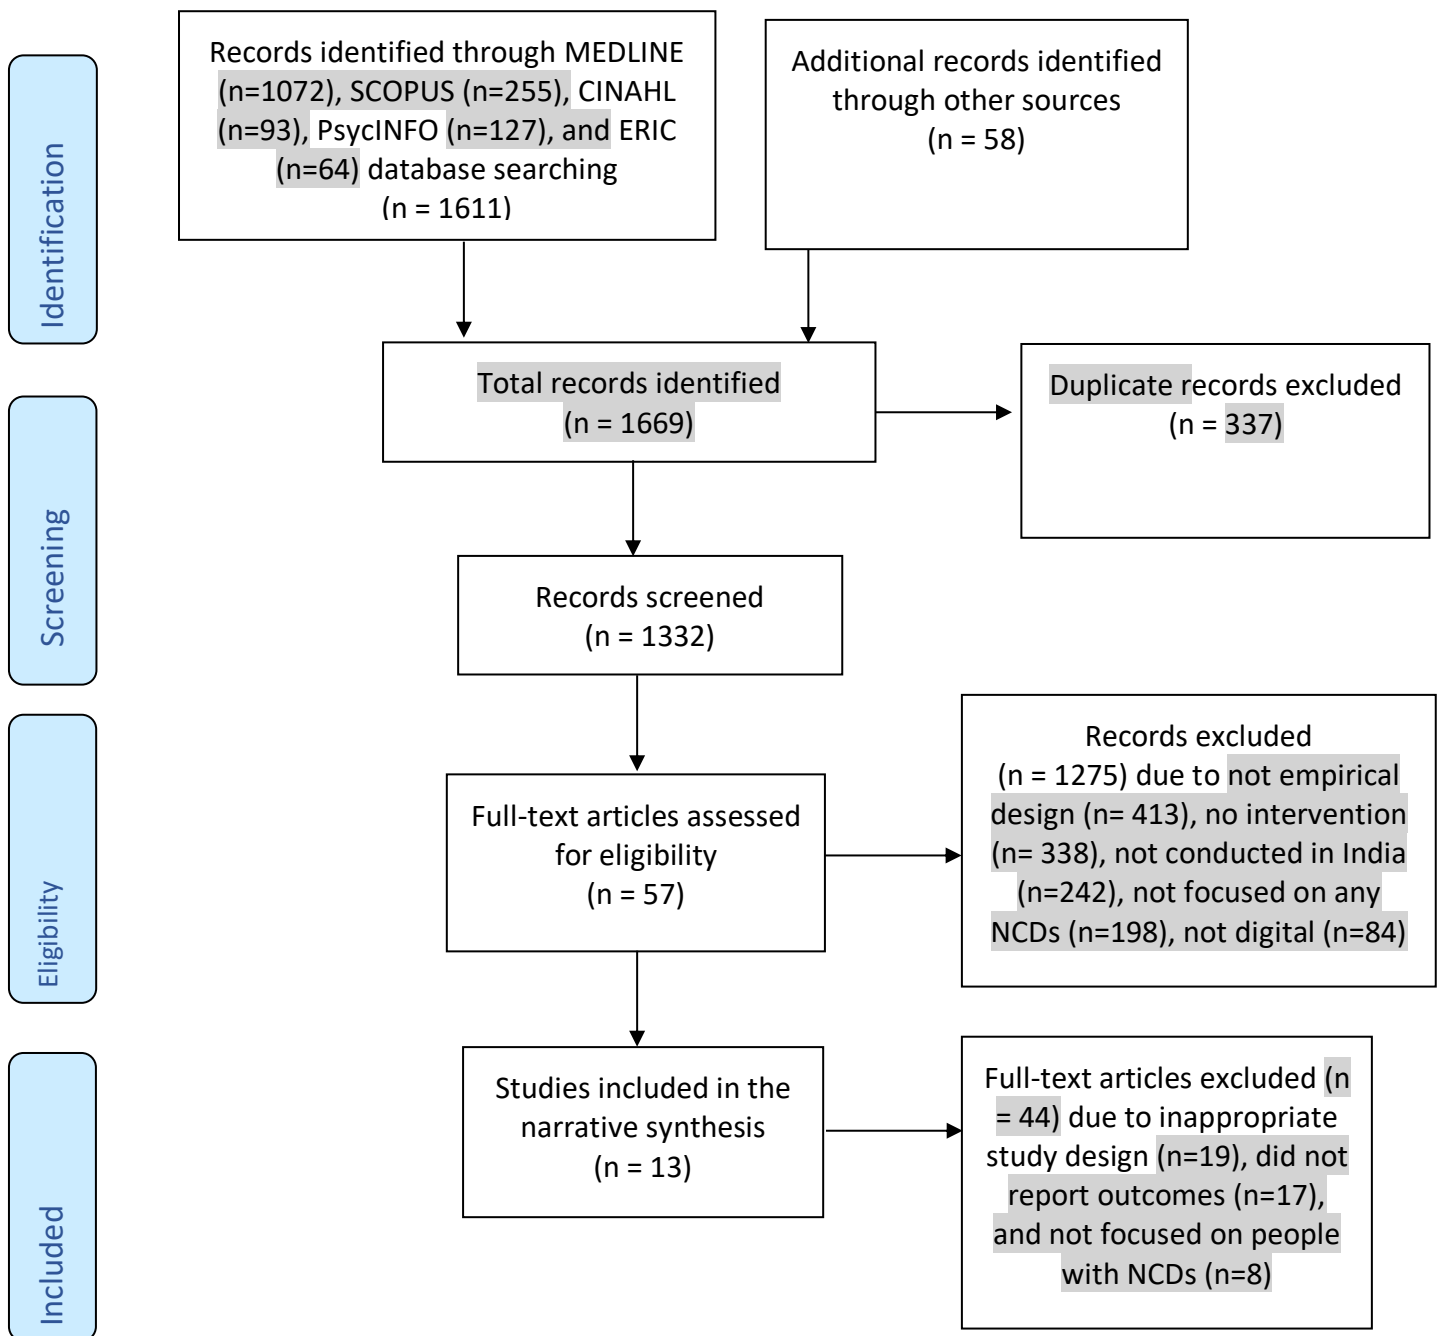

**Figure 1: PRISMA flow diagram of the systematic review**

Supplement: DHJ896153_Supplemental_Material.pdf [file DHJ896153_Supplemental_Material.pdf]
